# Supplementary material
Source: PubMed Central journal article supplement (PMC11108543)
Supplement: 18_2016_2173_MOESM1_ESM.pdf [file 18_2016_2173_MOESM1_ESM.pdf]

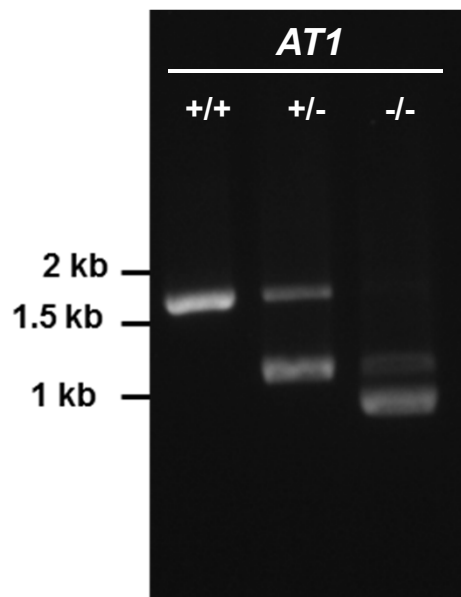

**Supplementary Figure 1: Genetic knock-out of *AT1* in *aqp2/aqp3* double-null *Trypanosoma brucei brucei***

1% agarose gel of PCR amplified *AT1* gene from *T. b. brucei* 2T1 *aqp2/aqp3*<sup>-/-</sup> parental cells (+/+) and heterozygous (+/-) or homo-zygous (-/-) deletion of *AT1*. Primers were *AT1\_f* (gaaatcccgcgtctttctcac) and *AT1\_r* (atgtgctgagccttttctt) at 56 °C annealing. The expected size for *AT1* is 1636 b; neomycin phosphotransferase (*NPT*) was used to replace the first allele (1051 b), puromycin-N-acetyltransferase (*PAC*) for the second allele (862 b).
