# Supplementary material
Source: PubMed Central journal article supplement (PMC11108543)
Supplement: 18_2016_2173_MOESM2_ESM.pdf [file 18_2016_2173_MOESM2_ESM.pdf]

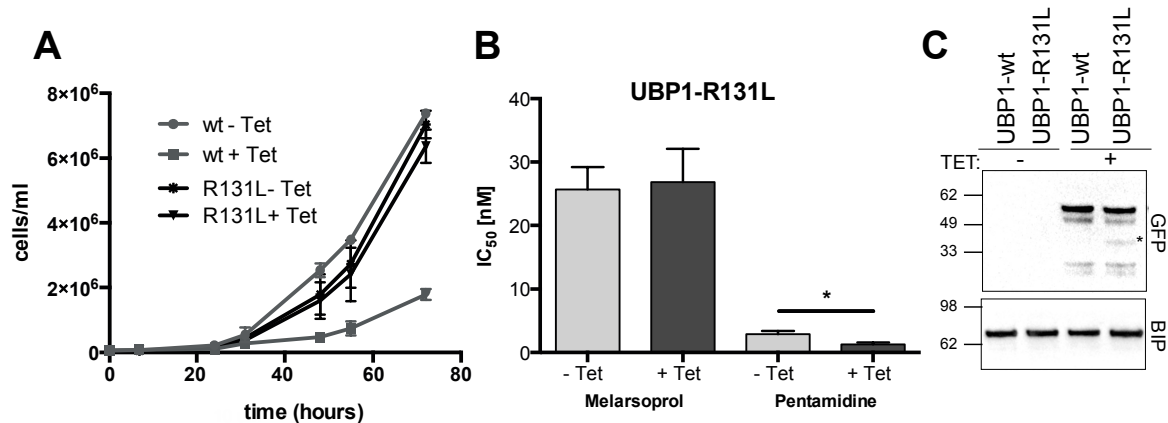

**Supplementary Figure 2: Overexpression of wild-type and mutant *UBP1* in *Trypanosoma brucei brucei***

**A)** Growth assay for GFP-*UBP1*-wt and GFP-*UBP1*-R131L transfected cells. Tetracycline induction of transgene expression was done at 1 µg/ml 24 hours before the first measurement. Error bars are standard deviations (n=3). Overexpression of GFP-*UBP1*-wt is toxic to trypanosomes (grey squares).

**B)** *In vitro* drug sensitivities (IC<sub>50</sub>) for melarsoprol and pentamidine determined with the Alamar blue assay for GFP-*UBP1*-R131L overexpressing cells. Error bars are standard errors of the mean (n=10). The asterisk denotes significant difference (p<0.05) as determined by two-tailed t-test (GraphPad Prism 5.0.).

**C)** Western blot with anti-GFP antibody showing inducible expression of GFP-*UBP1*-wt and GFP-*UBP1*-R131L 24 hours after tetracycline addition. After 24 hours of overexpression an additional band of about 40 kDa reproducibly appeared in the Western blots of GFP-*UBP1*-R131L, but not GFP-*UBP1*-wt, which might indicate partial degradation of the mutant protein.
