# Supplementary material
Source: PubMed Central journal article supplement (PMC11108543)
Supplement: 18_2016_2173_MOESM3_ESM.pdf [file 18_2016_2173_MOESM3_ESM.pdf]

**Comparative genomics of drug resistance in *Trypanosoma brucei rhodesiense***

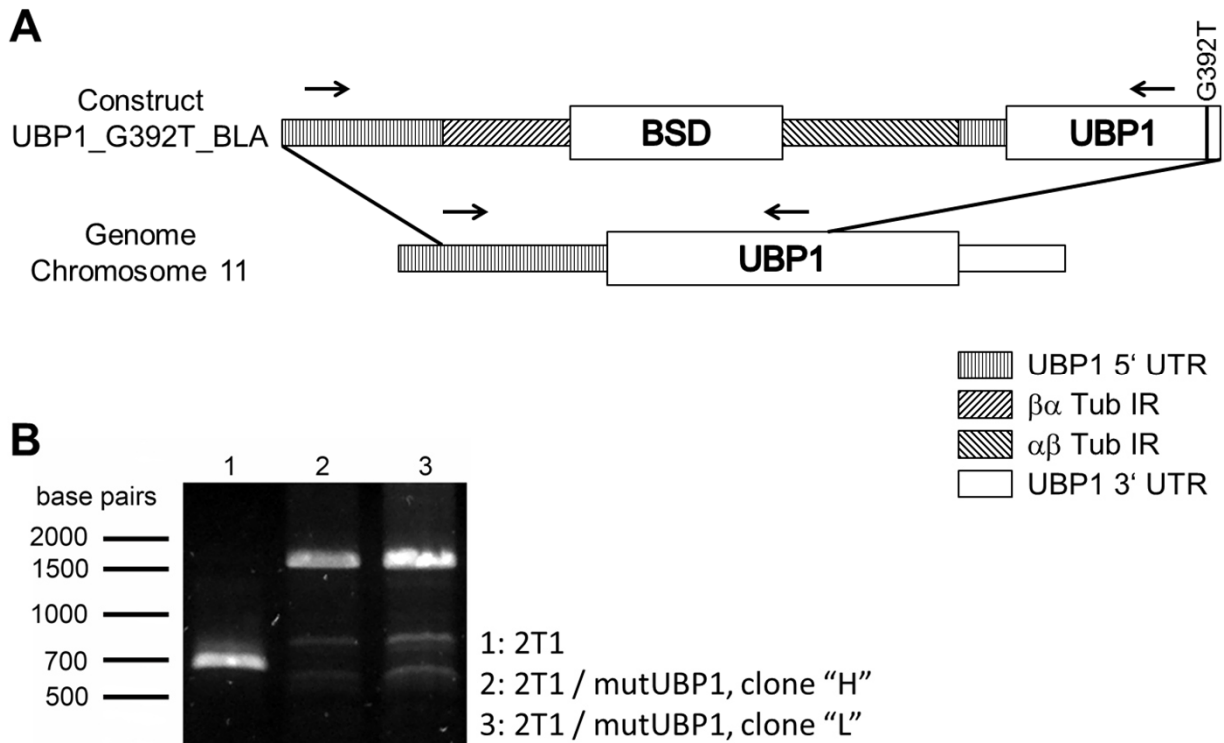

**Supplementary Figure 3: *In situ* expression of mutant *UBP1* in *Trypanosoma brucei brucei***

**A)** Structure of the *UBP1* locus (bottom) and the construct used for *in situ* introduction of the mutation G392T (BSD, blasticidin-S deaminase, UTR, untranslated region; Tub IR, tubulin intergenic region). Primer binding sites used for PCR (B) are indicated with arrows.

**B)** 1% agarose gel of PCR products from parental 2T1 cells (1) and two transgenic clones (2, 3). The expected size is 697 b for 'wild-type' *UBP1* and 1678 b for the construct with the mutant *UBP1*. Both transgenic clones are homozygous for the mutant *UBP1* gene as based on the absence of the 697 b band. Primers used were UBP1-2\_IR\_fwd (tgcattcgctcctttcctt) and UBP1\_rev (gacgagtctcccgatcacac).
