# Supplementary material
Source: PubMed Central journal article supplement (PMC11108543)
Supplement: 18_2016_2173_MOESM5_ESM.pdf [file 18_2016_2173_MOESM5_ESM.pdf]

Graf, Ludin et al. 2015

**Comparative genomics of drug resistance of the sleeping sickness parasite  
*Trypanosoma brucei rhodesiense***

|                                        | <b>STIB900</b> | <b>STIB900-M</b> | <b>STIB900-P</b> |
|----------------------------------------|----------------|------------------|------------------|
| High-quality (HQ) reads                | 1,418,416      | 1,513,957        | 1,482,415        |
| Average read length                    | 330 b          | 362 b            | 371 b            |
| Calculated coverage                    | 18-fold        | 21-fold          | 21-fold          |
| Mapped reads (all mapping quality)     | 1,212,557      | 1,205,716        | 1,201,165        |
| Mapped reads (mapq $\geq$ 20)          | 897,213        | 959,151          | 959,663          |
| Coverage with HQ bases (DP4 $\geq$ 5)  | 82%            | 82%              | 82%              |
| Gene coverage (gene length $\geq$ 95%) | 84%            | 81%              | 83%              |

**Table S1.** Whole genome sequencing (on the Roche-454 platform) and mapping statistics of parental, drug-sensitive *T. b. rhodesiense* STIB900 and its two drug-resistant derivatives STIB900-M and STIB900-P compared to the *T. b. brucei* TREU927 reference genome.
